# Supplementary material for: NEOage clocks - epigenetic clocks to estimate post-menstrual and postnatal age in preterm infants
Source: Aging (Albany NY). 2021 Oct 16;13(20):23527–44. doi: 10.18632/aging.203637 (PMC8580352; doi:10.18632/aging.203637)
Supplement: Supplementary Table 1 [file aging-13-203637-s001.xlsx]

## Sheet: Supplementary Table 1 PMA-450k
Supplementary Table 1. CpGs and corresponding coefficients of the 450k-PMA NEOage clock.
ID	coef
(Intercept)	35.5502
cg12172057	-0.00791437
cg05394010	-0.0797483
cg11353598	0.0125897
cg08569979	0.0723653
cg14516100	0.070148
cg13045134	-0.00750067
cg12510512	-0.0579682
cg25976672	0.0635282
cg23705938	0.14778
cg07196673	0.113822
cg02454264	-0.00633616
cg10914558	0.00142033
cg22262702	0.00437528
cg04777726	0.0438706
cg17525357	0.00104008
cg15825321	0.022706
cg02259047	-0.0867501
cg15414975	0.0346414
cg12917153	-0.00686434
cg17714010	-0.00887012
cg23556108	0.0380558
cg17227257	0.021765
cg02964287	-0.0129601
cg17739302	-0.0313922
cg20462129	0.00537017
cg17069437	-0.107261
cg22938135	-0.050949
cg25293806	0.0540982
cg09121569	0.0368749
cg15465548	-0.00188438
cg19852660	-0.121155
cg25243082	0.0536977
cg26868156	-0.0314663
cg09652312	-0.034385
cg00559635	0.0366096
cg13291836	-0.0709729
cg25465606	0.0039844
cg08297616	0.196916
cg24541835	-0.154466
cg07371504	0.000144125
cg21037935	-0.0652719
cg16282361	0.0206693
cg14678583	0.0513944
cg14397171	-0.0994841
cg24612059	0.0306816
cg25332265	0.0232997
cg14660839	-0.0394469
cg00758217	0.00365233
cg13963044	0.0369084
cg19172447	0.0215434
cg23357789	-0.0153119
cg02927682	0.00886399
cg03605610	0.00578405
cg13488570	0.011352
cg20627652	0.115323
cg15768443	-0.0085093
cg25604536	-0.0406347
cg20091689	0.0148239
cg02048922	-0.0220641
cg16288354	0.0650773
cg24867279	-0.050086
cg13166748	0.0430459
cg03867445	-0.0153494
cg22043296	-0.00198796
cg00536924	-0.0272559
cg14569639	-0.0664613
cg27111150	-0.0760783
cg05265234	-0.136278
cg03769927	-0.0328609
cg19637330	-0.00242946
cg02360514	0.123491
cg14565781	0.0289851
cg24306982	0.0199284
cg24741066	-0.00701698
cg04166042	0.0401669
cg06459492	-0.00046881
cg22206745	-0.0053862
cg18725867	0.0221779
cg27470213	0.0596629
cg03234775	0.0317758
cg27384476	0.131991
cg26818573	0.0749648
cg11311289	-0.000827443
cg26985149	0.10584
cg10857167	-0.0201289
cg14653593	0.0478851
cg16513215	0.0155964
cg17415947	0.0248377
cg09368875	-0.0181646
cg26283564	0.142808
cg08427067	0.0218592
cg07503684	-0.00161147
cg05354921	-0.0124701
cg04611159	-0.034659
cg02974976	0.0989446
cg19912309	-0.0248033
cg12615148	0.00675858
cg15168000	0.049513
cg27548752	-0.0101627
cg05641843	0.0162678
cg02853553	0.156552
cg22167763	0.0111772
cg12097330	0.0683929
cg18741044	0.0310707
cg21219851	0.0450207
cg00350448	-0.0104634
cg00049440	-0.124462
cg23243408	0.0503464
cg11851804	0.0249347
cg00330789	-0.0542955
cg24879257	0.142438
cg01454951	-0.0560325
cg17974054	0.0573039
cg04516022	-0.0156914
cg00117018	0.00145479
cg00962903	-0.0103314
cg21432763	0.0832008
cg12608433	0.00370382
cg01337514	0.023344
cg02295509	-0.109965
cg10534490	-0.000603523
cg09595275	0.000257364
cg05343808	0.0801719
cg02298220	0.0134458
cg21737020	0.0380502
cg10035564	-0.0133237
cg22879111	0.0655836
cg20547295	-0.0757972
cg03297356	-0.117508
cg19144497	0.0365995
cg12669543	0.0250865
cg08573089	0.0572134
cg06070445	-0.00938141
cg00851394	-0.0069643
cg16601904	0.11381
cg21416692	-0.0577183
cg09762533	-0.0376591
cg25149218	-0.092499
cg14400718	0.000491786
cg00965154	0.070633
cg08468772	0.12479
cg15068180	-0.000304624
cg27527874	0.0621905
cg01401327	-0.0336361
cg21876869	-0.0223326
cg26084259	0.000850064
cg11267527	-0.0179382
cg27446570	-0.00951084
cg15993943	-0.0234545
cg21664351	0.0192858
cg12360736	-0.0330696
cg22786472	-0.0893546
cg05024961	0.0153446
cg07983575	0.00531642
cg17747265	-0.0131975
cg12266861	0.0693407
cg08909806	-0.00191192
cg12164202	0.00517247
cg10256726	-0.00993619
cg15877915	0.0304102
cg05145428	-0.0143923
cg05507459	-0.0440955
cg12025243	0.033542
cg03607573	0.0890688
cg25281029	-0.0487599
cg10476585	0.00809747
cg13694291	-0.00510353
cg12153668	-0.0178866
cg19825277	0.023881
cg17206772	-0.0562615
cg18207699	-0.0201154
cg03785303	-0.116097
cg13986870	-0.115439
cg03811629	5.501e-05
cg12422968	-0.032839
cg20128099	0.047794
cg04368808	0.0149783
cg02396836	0.000324294
cg09631059	0.00913443
cg00592058	-0.016143
cg06766541	0.0346724
cg18319790	0.037875
cg10045881	-0.00276358
cg09434667	0.0249089
cg08308725	-0.0409679
cg07749074	0.00730246
cg01859616	0.0391693
cg24432632	0.0148509
cg01610494	0.0111875
cg20652899	0.00367115
cg21886367	-0.0542382
cg06185532	0.00375715
cg15932284	-0.00869755
cg18683707	-0.00181129
cg23061795	0.000239901
cg23676577	0.0445381
cg06902099	-0.0248839
cg05244153	0.0105697
cg03432176	-0.0538348
cg07992484	-0.036393
cg12559179	0.00241051
cg15615645	-0.089467
cg04436818	-0.00352681
cg20177507	0.00716581
cg07318287	-0.0333535
cg04862002	0.0969783
cg03803086	0.0637897
cg02502358	0.0949996
cg24633656	-0.00974832
cg23973801	-0.0238869
cg20759600	0.150651
cg25392325	-0.0166834
cg07056967	-0.0741604
cg26934759	0.0151149
cg22007809	0.0623684
cg00465247	0.0594543
cg15029032	0.000778109
cg17729253	-0.0197387
cg18898325	-0.0153284
cg13523386	0.00593199
cg20384941	0.0706196
cg00966522	-0.00752135
cg25586410	-0.0218153
cg04744624	0.061637
cg11891239	-0.0247516
cg10683527	-0.018571
cg14916108	0.00250161
cg00420510	0.0432647
cg20125920	-0.0249343
cg16371538	-0.0429674
cg15392111	-0.0549747
cg22331740	0.00266649
cg05008898	0.0721359
cg05603252	-0.00956717
cg20215476	0.0318075
cg00523742	-0.0169787
cg25105652	0.0470857
cg13945667	-0.00135847
cg06503573	0.0553898
cg00988641	-0.00160321
cg15824323	-0.144168
cg22411784	-0.0275838
cg01138164	0.0124608
cg10076954	7.31206e-06
cg04507495	-0.000585494
cg20308540	0.126967
cg27582585	0.0178086
cg07152925	0.000574078
cg26904787	-0.0161432
cg06621744	0.000385826
cg14547895	0.00253546
cg16470877	-0.00702074
cg22948684	-0.0294012
cg06852395	0.0473107
cg14051236	0.0362676
cg18583931	0.0100052
cg06225294	0.0394403
cg26502238	-0.0139377
cg18513023	0.20033
cg26820327	0.000600037
cg20699549	-0.0362276
cg05036147	-0.014914
cg11150901	-0.0293623
cg25559421	0.0550119
cg23741520	-0.0147113
cg11854504	0.0244472
cg22117819	-0.0228072
cg13942103	-0.142624
cg06807726	-0.0233479
cg13660086	0.0203788
cg21135560	0.0678527
cg17208427	0.103514
cg12298259	0.0152401
cg02206636	-0.0265253
cg03801871	0.049278
cg12845923	0.00928765
cg07712663	0.0292556
cg24308847	-0.0614853
cg13489049	0.0473365
cg11957475	-0.0225004
cg21875946	0.0282256
cg09712902	0.00434687
cg06112560	0.00213107
cg07070113	0.011847
cg11201229	0.0532807
cg07085632	0.0672108
cg24010903	0.000949436
cg01948724	0.0106258
cg01044293	-0.00268557
cg23715056	0.0275728
cg01916724	-0.0513174
ch.20.54687769F	-0.0307365
cg24315421	-0.121413
cg23599026	0.00308636
cg05624226	-0.28692
cg04503912	0.0351881
cg10513595	0.0313902
cg19779057	0.0160317
cg06864895	-0.00290954
cg27027427	-0.0288271
cg26013791	-0.0259717
cg18612461	0.0761392
cg04779860	0.00473833
cg24469013	-0.0983825
cg18725599	0.00895626
cg11807188	-0.0543912
cg26074025	-0.00842721
cg03149313	-0.0357257
cg27035734	-0.0888728
cg05314024	-0.0145867
cg04127998	0.0688438
cg13594711	0.00646187
cg11940526	0.00924346
cg24268161	0.000780711
cg23490077	0.0625329
cg23090936	0.0303856
cg04787675	-0.0152678
cg13579295	-0.0201901
cg13624964	0.0311956
cg19348484	0.0593286
cg12868312	0.0017518
cg09024962	0.0223896
cg27629453	0.00419525
cg01701585	0.0461317
cg07187105	-0.00759615
cg13132182	0.010517
cg24546723	0.0363112
cg21545720	0.018316
cg10380019	0.0128487
cg04329382	-0.00549796
cg08780680	-0.0519621
cg04862321	-0.0918651
cg14141610	0.0646262
cg14613361	0.00493764
cg11624780	-0.0192778
cg14618634	0.0140064
cg13688202	0.0437144
cg10807105	0.0765989
cg04276723	0.0559065
cg03416521	-0.000358006
cg00399027	0.00253829
cg13570585	-0.0741785
cg09418701	0.0288328
cg09000832	0.0696753
cg14529565	0.0247774
cg21723559	-0.0966748
cg05772692	0.000896869
cg07348418	0.00828823
cg00120416	-0.0123238
cg18396984	0.071899
cg03546163	-0.00857091
cg07190012	0.0471664
cg27421810	0.00991073
cg07894717	-0.00282481
cg27130954	-2.50421e-05
cg01821149	0.00715094
cg03253556	0.00376231
cg23154272	0.0137027
cg02150231	-0.0784126
cg27214652	-0.0153317
cg02303016	0.000513339
cg13960660	-0.00343408
cg01607897	-0.00802165
cg06258834	-0.0232469
cg03250870	-0.013872
cg04333785	-0.0183902
cg19873536	-0.0665822
cg26460483	-0.141829
cg02827061	-0.0297495
cg22592140	0.0197377
cg19717060	0.00693184
cg17918558	0.049255
cg23211736	-0.00417964
cg14608275	-0.00558625
cg25716102	0.0121155
cg04379703	0.031947
cg16312552	0.0779436
cg09469986	0.0439656
cg14954582	0.00668618
cg13969674	0.037854
cg26274662	0.0833639
cg20221591	-0.0339222
cg24042313	0.00800688
cg09281220	0.0808068
cg27589058	0.0523462
cg17995197	-0.00279706
cg27490391	0.0123311
cg18390683	-0.0238161
cg26022064	-0.0463994
cg05758804	-0.0181089
cg00626119	0.0663283
cg14126884	-0.0859879
cg11227822	0.0355804
cg06479607	-0.0448127
cg09068447	-0.00878526
cg16439394	0.000330619
cg03637976	-0.0326485
cg21339969	0.0520739
cg11245384	0.0459726
cg02131018	-0.0427812
cg06002476	-0.0176718
cg04139465	-0.00737456
cg09248429	0.0331916
cg14480531	0.00454615
cg16626063	-0.0298796
cg11915366	0.0125629
cg05969808	-0.01536
cg11529819	-0.180351
cg08246632	0.104498
