# Supplementary material for: NEOage clocks - epigenetic clocks to estimate post-menstrual and postnatal age in preterm infants
Source: Aging (Albany NY). 2021 Oct 16;13(20):23527–44. doi: 10.18632/aging.203637 (PMC8580352; doi:10.18632/aging.203637)
Supplement: Supplementary Table 2 [file aging-13-203637-s002.xlsx]

## Sheet: Supplementary Table 2 PNA-450k
Supplementary Table 2. CpGs and corresponding coefficients of the 450k-PNA NEOage clock.
ID	coef
(Intercept)	8.9654
cg13977827	0.00690978
cg05394010	-0.182689
cg26736200	0.0590697
cg14516100	0.00275359
cg12510512	-0.0450124
cg25976672	0.00353341
cg23705938	0.00540998
cg00422699	-0.0267462
cg04777726	0.0589098
cg10313947	0.201029
cg02259047	-0.00810729
cg02964287	-0.020626
cg15760474	0.0236625
cg02162534	-0.0622828
cg14328115	0.168099
cg02185675	0.0226393
cg24828746	-0.000810986
cg23476877	0.00712359
cg15448210	0.0109389
cg20202112	0.0332606
cg08297616	0.0698743
cg21435684	-0.119189
cg14136893	0.140561
cg24541835	-0.140211
cg13496862	0.280035
cg21991195	-0.0255796
cg25500196	0.0179334
cg13225830	-0.0637981
cg10900641	-0.175862
cg12063490	-0.0680961
cg06665333	-0.037775
cg14660839	-0.00933365
cg03365751	0.0848621
cg13963044	0.0052641
cg19126169	-0.0137153
cg24637308	0.0235475
cg16521032	0.0134735
cg24045078	-0.0552329
cg26797158	0.0336026
cg25770702	0.0280556
cg12530994	-0.112939
cg13488570	0.071104
cg19283806	-0.11271
cg04873169	-0.0439436
cg00583535	-0.0580362
cg26593380	0.000785987
cg08662533	-0.0602114
cg03284879	0.0334602
cg23176214	-0.000220535
cg11006453	0.00295628
cg05265234	-0.0770658
cg05791870	0.0944323
cg08664849	-0.100645
cg27616227	-0.170402
cg07974504	0.00577384
cg05928290	0.0821706
cg26559974	0.146016
cg24121069	0.0116115
cg25611087	0.0242793
cg16162970	-0.0193077
cg22206745	-0.0321874
cg22251148	0.233852
cg17267654	0.0693533
cg06420903	0.0820402
cg18725867	0.0366824
cg00667789	0.0584674
cg07021906	-0.054019
cg26600753	0.0153653
cg20744756	0.0448143
cg24222194	-0.0146949
cg10169763	-0.020725
cg10576151	0.0368767
cg04100190	0.0126318
cg14862395	0.0081995
cg23055236	0.0822999
cg12404590	-0.0904317
cg15893360	0.128629
cg10354512	0.0222592
cg17161421	0.00967596
cg02648939	0.0517751
cg01652514	-0.0461585
cg14879569	0.0214647
cg26695881	0.0721901
cg27548752	-0.0663025
cg21829116	0.0193715
cg21219851	0.0587549
cg01876531	0.0276271
cg05345310	0.056067
cg02704158	0.0154117
cg10985479	0.0272464
cg20663219	0.00779565
cg00049440	-0.172002
cg12461551	-0.0370794
cg03018256	0.0878836
cg07052737	-0.0691197
cg17828456	0.013349
cg07231045	0.0169841
cg23247968	0.0218315
cg00626856	-0.058731
cg01454951	-0.218008
cg04049225	0.0108522
cg15749157	-0.0383208
cg12541478	-0.0609497
cg05414225	-8.25387e-05
cg05784157	0.0238872
cg05343808	0.0803333
cg18730174	0.000973254
cg06413398	-0.0518487
cg26711406	0.0381759
cg21737020	0.0302363
cg01964562	0.00750546
cg00278392	-0.0134089
cg15218995	-0.0417935
cg26678245	-0.0822203
cg00851394	-0.011259
cg11992241	0.0079067
cg15736165	-0.00423319
cg10284755	0.0264192
cg06215416	0.0329956
cg16853770	-0.0581103
cg19818308	0.10054
cg26640901	0.0112089
cg22687902	0.00245109
cg21876869	-0.0112309
cg16579908	0.0229053
cg11469308	0.00134367
cg21664351	0.0303048
cg21940313	0.0204798
cg16323245	-0.09727
cg06884254	0.0525436
cg12266861	0.104677
cg26470501	-0.00870181
cg16106254	-0.000135301
cg13716443	-0.00904785
cg25827022	0.0095812
cg15877915	0.0536537
cg27486692	-0.0163511
cg02225096	-0.0559409
cg25103160	0.00978189
cg11099684	0.00597631
cg10531003	-0.0295862
cg11279838	-0.0506898
cg03785303	-0.0384845
cg04057861	-0.0835754
cg13708645	0.0166062
cg14553444	-0.0200101
cg08203715	0.0724471
cg02078525	-0.0918153
cg01180441	-0.019236
cg24432632	0.0100889
cg16804165	0.0527762
cg07010088	0.0504344
cg11838152	-0.0686897
cg23260877	-0.0358664
cg06902099	-0.062486
cg12516875	-0.0511278
cg17080882	-0.0483652
cg07992484	-0.0350855
cg08090640	-0.0133319
ch.2.75111475F	0.00655525
cg20177507	0.0851268
cg07318287	-0.0440139
cg04862002	0.0194293
cg16316042	-0.0101072
cg22856948	0.00582458
cg19088984	0.00990873
cg04837309	0.00432431
cg07306685	0.00819455
cg25392325	-0.0844263
cg27664674	-0.0154071
cg22007809	0.160479
cg00465247	0.0363436
cg23678254	-0.0616788
cg01503450	0.0408702
cg13523386	0.00920451
cg00966522	-0.0332312
cg15983626	0.022784
cg24536244	-0.0558321
cg20125920	-0.0311958
cg14640865	-0.0392086
cg03691549	0.0784283
cg04945153	-0.00278315
cg04590384	-0.0219051
cg07558761	-0.069945
cg16474118	-0.0630398
cg25254949	0.0260589
cg17270101	-0.0358545
cg27362010	-0.00525308
cg19746940	-0.075017
cg12106894	0.0168719
cg01138164	0.17176
cg08867549	0.037191
cg12930882	0.0232109
cg10541767	0.0746407
cg03515844	0.0441843
cg07815238	0.000411223
cg19513004	0.102404
cg26413942	-0.0152137
cg15727463	-0.0901773
cg22948684	-0.0993096
cg25843003	-0.00946298
cg21449597	-0.0294687
cg07559526	0.00214502
cg18500830	-0.0334028
cg26820327	0.0436925
cg02803604	0.000960111
cg04561571	-0.00281311
cg26517376	-0.0720511
cg15589126	-0.00324065
cg04095339	0.0040715
cg23931734	-0.00258759
cg13942103	-0.0759049
cg09672187	-0.0517515
cg13660086	0.110879
cg21135560	0.0267025
cg15823642	0.0424729
cg05997362	-0.0214847
cg05385282	-0.00706276
cg13489576	0.0573325
cg19764731	-0.0527089
cg13792444	0.11554
cg04282607	0.0504228
cg11598720	0.011139
cg23381494	-0.0123831
cg22483743	0.0100811
cg24219985	0.0219074
cg07732472	0.0855456
cg01916724	-0.0556144
cg08756033	0.00596744
cg05624226	-0.435035
cg22842797	0.00747913
cg06566994	0.0455616
cg04132407	-0.166253
cg21982420	0.00840019
cg04272355	0.0055659
cg24361808	-0.0333358
cg01239154	0.0271598
cg26074025	-0.062254
cg05910867	0.00724794
cg06185452	0.0315968
cg06423822	0.0128358
cg23490077	0.0535357
cg11439695	-0.00645576
cg04050898	0.015824
cg13624964	0.0728358
cg09987240	0.0013654
cg10202436	-0.0285739
cg11143674	0.210073
cg09024962	0.0579154
cg03138928	-0.0675061
cg24474319	0.119755
cg23342367	-0.0191683
cg16555181	0.00154182
cg02899253	-0.0662487
cg10380019	0.0467634
cg04329382	-0.00775788
cg22500261	0.0203599
cg08780680	-0.0721007
cg18384588	-0.0675612
cg04290119	0.0561079
cg09418701	0.0158267
cg09000832	0.0952193
cg14529565	0.00560755
cg21723559	-0.0417575
cg23032936	-0.0440271
cg14051264	-0.0836584
cg13241645	0.0222163
cg01266159	0.00380087
cg03546163	-0.0851269
cg07190012	0.121993
cg07894717	-0.0388603
cg04789761	-0.0293805
cg20168901	0.035541
cg23171628	-0.00558254
cg02424715	0.0110802
cg10043954	0.012574
cg12289983	0.0133728
cg06936290	-0.0167487
cg13475484	0.121304
cg04689880	-0.0241164
cg00580497	-0.0167466
cg05609751	0.00368194
cg09026360	0.0769002
cg12550344	0.0621085
cg17715521	0.0966411
cg03866862	0.0371548
cg04180086	0.0504855
cg27294168	0.0356132
cg17995197	-0.0446937
cg19622474	0.00790106
cg18390683	-0.0105512
cg00579036	-0.0312413
cg02500231	0.0162791
cg22296612	0.0105773
cg06002476	-0.0142432
cg08694418	0.0713525
cg09248429	0.0216931
cg13396900	0.037247
cg10177197	0.0147455
cg11529819	-0.0306706
cg22707438	0.0345518
cg19350024	-0.00530726
cg19771626	0.0141555
