# Supplementary material for: NEOage clocks - epigenetic clocks to estimate post-menstrual and postnatal age in preterm infants
Source: Aging (Albany NY). 2021 Oct 16;13(20):23527–44. doi: 10.18632/aging.203637 (PMC8580352; doi:10.18632/aging.203637)
Supplement: Supplementary Table 3 [file aging-13-203637-s003.xlsx]

## Sheet: Supplementary Table 3 PMA-EPIC
Supplementary Table 3. CpGs and corresponding coefficients of the EPIC-PMA NEOage clock.
ID	coef
(Intercept)	34.2729
cg05394010	-0.0457898
cg26694831	-0.00500889
cg14516100	0.0430493
cg14711997	-0.000753418
cg23705938	0.145971
cg02454264	-0.00162201
cg22262702	0.021684
cg10496184	0.000390313
cg04777726	0.00506478
cg17525357	0.00288607
cg18547371	0.000363455
cg02259047	-0.0046859
cg02286602	-0.0252863
cg14052728	-0.0120333
cg17227257	0.0360055
cg02964287	-0.0619889
cg17069437	-0.0650964
cg25293806	0.0253649
cg09121569	0.0480781
cg25243082	0.0149139
cg26868156	-0.0119642
cg09652312	-0.083538
cg11857013	-0.00279268
cg00559635	0.0311534
cg25878452	0.115322
cg04273303	-0.00823076
cg13291836	-0.0758427
cg24398268	0.0168502
cg16126286	0.00528486
cg08297616	0.100072
cg01412970	-0.00894492
cg24541835	-0.0125206
cg07371504	0.016252
cg16282361	0.0124372
cg22017213	0.0337001
cg24612059	0.0467724
cg25332265	0.0321291
cg26509022	-0.0403488
cg07856470	0.0139178
cg13963044	0.0168117
cg19172447	0.0172417
cg23357789	-0.0720808
cg15551687	0.00326653
cg02927682	0.0432429
cg15174564	0.0127894
cg22276612	0.00451266
cg16288354	0.0316686
cg00584026	0.0299704
cg15994182	-4.3315e-05
cg01403055	-0.0531788
cg05265234	-0.050635
cg03769927	-0.0920007
cg11335133	-0.000664436
cg17842621	-0.00721854
cg02360514	0.000952151
cg05125483	-0.0153545
cg22806078	-0.0132859
cg27470213	0.0076981
cg27384476	0.105636
cg03734133	0.0271471
cg19649900	-0.0043924
cg22685935	0.0043565
cg12797807	0.0365454
cg26818573	0.016751
cg26094312	0.0702289
cg01529701	0.000107175
cg07824888	0.0126672
cg17716056	-0.123988
cg05423425	0.0746638
cg26985149	0.00154953
cg10885779	0.0768433
cg13177972	-0.0260715
cg23035781	0.00520499
cg07779484	0.0580106
cg23904581	0.0010783
cg16787312	0.0231627
cg14653593	0.0266243
cg11544522	0.0205146
cg10161289	0.0337621
cg16513215	0.031724
cg16061128	-0.036188
cg18310453	-8.87098e-05
cg10159300	-0.00423435
cg09252377	0.00104064
cg09887687	-0.140297
cg09368875	-0.0298039
cg13217260	-0.0271527
cg26283564	0.0617514
cg20504084	-0.0202628
cg19445230	0.0188479
cg05354921	-0.040086
cg24587427	0.0959264
cg10873538	0.0541562
cg00292432	0.0220541
cg02974976	0.0256465
cg15324969	-5.80542e-05
cg27109106	-0.000238611
cg09545368	0.00681095
cg06405820	-0.00979696
cg20280553	0.0288034
cg07002447	-0.00349006
cg03214468	-0.000290627
cg02853553	0.148256
cg09847717	-0.00107622
cg12097330	0.020951
cg05953142	0.00466652
cg18741044	0.0767823
cg21219851	0.0140577
cg04654543	-0.00017021
cg01070424	0.0115164
cg18948488	-0.000763986
cg02616341	-0.0420727
cg00350448	-0.00199139
cg05249382	0.0155389
cg04174354	0.0408736
cg00049440	-0.063344
cg19454119	0.09482
cg10319924	0.0140529
cg11851804	0.018215
cg15356281	-0.0294975
cg00330789	-0.0393754
cg09878971	-0.0185302
cg01454951	-0.0295464
cg19714260	0.0369629
cg18021070	-0.045008
cg15482230	0.00072311
cg06070592	-0.0211788
cg21432763	0.0276491
cg12608433	0.0608782
cg01709492	-0.0343672
cg27312626	0.0120599
cg05343808	0.0618162
cg10006732	0.000557775
cg22255565	-0.0164452
cg00452412	-0.050691
cg24698979	0.0705736
cg20154003	0.00227597
cg12501142	0.0108183
cg11843146	0.060395
cg21737020	0.014246
cg12654533	0.000222171
cg00120299	0.0686467
cg26551069	0.00184585
cg11638496	0.00468052
cg11423736	0.103472
cg20547295	-0.0959187
cg03297356	-0.115337
cg00039945	0.0234902
cg12669543	0.00252522
cg22745515	0.00209076
cg08573089	0.0924959
cg23246961	-0.0734329
cg17159621	0.0456285
cg08109529	0.0471345
cg16601904	0.0612374
cg04746486	0.000717067
cg21416692	-0.000241265
cg12226228	-0.0146006
cg07811779	0.0135461
cg19607918	-0.0177508
cg05752573	-0.0110027
cg00965154	0.0499518
cg02126031	0.00559887
cg19628619	-0.00197969
cg21793795	-0.00118983
cg08468772	0.0654403
cg08491306	0.0642715
cg24142849	0.0222477
cg19818308	0.00994334
cg01102477	0.0655868
cg27527874	0.0173813
cg09964370	-0.0692451
cg26084259	0.0236165
cg11712893	-0.000190381
cg00607069	-0.0183401
cg12268142	0.0973654
cg09139085	0.0150748
cg17015095	0.0544794
cg27430693	0.0065205
cg21664351	0.0198683
cg16264004	0.00627128
cg12360736	-0.01352
cg22786472	-0.0409363
cg00901574	0.0144542
cg21473786	0.0290772
cg15937799	-0.0229543
cg01468567	-0.000765229
cg10165952	0.0779324
cg03325664	-0.000112094
cg01727495	0.0516499
cg00795186	-0.00835829
cg18705881	0.0131887
cg04372536	-0.00718377
cg12266861	0.0449967
cg02111981	-0.076461
cg13716443	-0.00189539
cg12164202	0.00763907
cg06161147	0.00114438
cg24543970	-0.0121177
cg05507459	-0.0318978
cg10622580	0.0166932
cg12025243	0.0199671
cg07729325	0.0027364
cg03607573	0.0492993
cg25281029	-0.00060122
cg17893421	0.0208364
cg23577104	-0.0332421
cg05533219	0.0937294
cg13694291	-0.000924564
cg05746499	-0.0696976
cg17353106	-0.0055437
cg17206772	-0.0573442
cg15699099	0.0283616
cg13986870	-0.00151699
cg07093435	-0.013324
cg09599016	0.00859057
cg25639387	-0.009086
cg04368808	0.0173848
cg09163646	-0.00325104
cg11451946	0.0266712
cg05533932	-0.0896979
cg20066216	-0.0206313
cg11360920	0.00962982
cg05132821	-0.128261
cg06766541	0.00909255
cg08220541	-0.0395247
cg22619104	-0.00584032
cg18319790	0.0136747
cg02088582	0.00636645
cg00103200	-0.077442
cg01396274	-0.00987521
cg06896210	0.00663788
ch.7.137597056R	-0.0029245
cg18253885	-0.0539344
cg18257796	0.0374228
cg02656472	-0.0214406
cg08308725	-0.109296
cg01859616	0.0185573
cg06465371	-0.0041398
cg01610494	0.00188928
cg21886367	-0.0330719
cg07010088	0.0315801
cg20386759	-0.00444124
cg22320696	-0.000805534
cg18246442	0.0968805
cg26665701	0.0327076
cg15932284	-0.0237214
cg18453481	0.0130319
cg04734289	-0.000304826
cg12326725	0.0241328
cg27102864	-0.0446972
cg10939112	-0.0297311
cg05161243	0.0353426
cg27176264	0.00870203
cg23676577	0.0536176
cg06902099	-0.00513679
cg15258695	-0.00925896
cg00253346	0.00463071
cg05244153	0.000539365
cg24487024	0.00894508
cg03432176	-0.0442789
cg06398562	0.00166319
cg15615645	-0.0648344
cg17788374	0.0261994
cg22449462	-0.0410394
cg07318287	-0.0568406
cg04862002	0.0395078
cg03803086	0.0544882
cg20893039	-0.0181741
cg02502358	0.0376412
cg00058128	0.0820487
cg05172429	-0.00921085
cg02806802	-0.0123815
cg11358199	0.00901243
cg23973801	-0.0474576
cg12750534	0.0478723
cg20759600	0.100222
cg07056967	-0.0648506
ch.10.2545310R	0.0159828
cg00465247	0.00361383
cg00767442	-0.031607
cg00599726	-9.34684e-06
cg26348054	0.000623368
cg21043557	0.00573797
cg09772831	-0.0104418
cg21735068	4.59907e-05
cg24119470	0.00668065
cg04744624	0.0410418
cg08039237	0.0504376
cg13860292	-0.0461746
cg08840620	-0.128333
cg03976842	0.0101952
cg10683527	-0.00219584
cg25886683	0.000329053
cg14139123	-0.00869192
cg15565343	0.014116
cg20125920	-0.000120108
cg16371538	-0.0202994
cg14114801	0.0465271
cg15392111	-0.0430647
cg02608124	-0.00288983
cg00834712	-0.000393888
cg03945763	0.0220537
cg24477309	-0.0140319
cg05646550	-0.0531289
cg05008898	0.0861483
cg21804327	8.79924e-05
cg24898318	-0.00149889
cg12734086	-0.0468245
cg27546699	0.00581845
cg08941595	0.045601
cg25105652	0.0329862
cg15874753	-0.000987189
cg06503573	0.0231297
cg24339048	-0.0518424
cg08935541	-0.0156831
cg15824323	-0.0714356
cg25225705	-0.0353247
cg01138164	0.0243781
cg04507495	-0.0322401
cg20308540	0.115994
cg03148889	-0.0413094
cg06621744	0.0112266
cg10486291	-0.00882164
cg04527432	-0.0414527
cg17165773	-0.0382974
cg03401297	-0.00752651
cg26532527	0.0218074
cg18768862	-0.0782788
cg10909390	-0.0311459
cg06852395	0.0231768
cg09237247	-0.0104513
cg02407222	0.0637796
cg01206335	0.0102487
cg18513023	0.14699
cg20699549	-0.0425404
cg11150901	-0.0587434
cg13530263	0.000435708
cg08290668	-0.00928827
cg23403031	0.0172791
cg23741520	-0.000360169
cg11854504	0.0263186
cg16929695	0.00784192
cg13942103	-0.0945455
cg10302026	0.0545582
cg18496115	-0.0723373
cg06807726	-0.0301009
cg13660086	0.00605787
cg21135560	0.00510997
cg27341789	-0.00503142
cg18279757	0.00464002
cg17208427	0.0797233
cg04971650	0.0116402
cg03801871	0.010001
cg07712663	0.0329072
cg13976755	0.0141894
cg16825935	-0.00935982
cg24308847	-0.0532801
cg13792444	9.07601e-05
cg23277699	-0.0786073
cg18656310	-0.0124656
cg04282607	0.00492187
cg12080113	0.0601416
cg09712902	0.00529634
cg12172022	-0.0188036
cg01811918	0.0132998
cg07085632	0.0272565
cg05937442	-0.000502063
cg24010903	0.00828955
cg25376300	0.00208283
cg01916724	-0.0464259
cg09222192	-0.00122076
cg24315421	-0.0992752
cg05476493	0.0334247
cg13111471	0.0197613
cg05624226	-0.198189
cg22116061	-0.047264
cg15278747	-0.0368451
cg04779860	0.00661944
cg12626971	0.0231981
cg02607450	-0.083361
cg24469013	-0.000353613
cg18694483	0.0263384
cg03626415	-0.101401
cg11807188	-0.00213959
cg03149313	-0.0115525
cg27035734	-0.0483416
cg12428558	0.00728226
cg05314024	-0.0182576
cg04127998	0.060455
cg13828788	0.076692
cg18632291	0.00945866
cg16076065	-0.010235
cg08893479	0.00214624
cg12642568	-0.0273955
cg14038650	0.000932042
cg10577538	-0.00368885
cg20938154	-0.0287495
cg23490077	0.0892892
cg23090936	0.0101347
cg21263455	0.0859618
cg06650386	0.0667025
cg13579295	-0.00838027
cg13624964	0.0249317
cg04318178	-0.0344757
cg13326354	0.0096525
cg17451712	-0.0162224
cg06792393	-0.0116819
cg22539465	-0.00115656
cg19108737	-0.0182772
cg01701585	0.0279375
cg07187105	-0.00124649
cg13132182	0.0292589
cg03530294	-0.0243221
cg10380019	0.0573352
cg24982682	-0.000605935
cg05473205	0.0442683
cg08780680	-0.0119074
cg04862321	-0.0298508
cg14141610	0.0316864
cg25212737	-0.026215
cg14618634	0.00699749
cg05919454	-0.0173029
cg04276723	0.0190741
cg24811886	0.00513511
cg04265619	0.0621778
cg24401660	-0.0865572
cg27567222	0.0686867
cg06708956	0.187105
cg13570585	-0.0655154
cg09000832	0.0175035
cg17047158	0.013334
cg16904375	-0.0465863
cg14584636	0.049623
cg01017367	0.14345
cg01242316	0.0525657
cg07348418	0.0154671
cg16994082	-0.0438742
cg27045756	0.00692178
cg00969570	-0.0149318
cg01868405	-0.011561
cg20817199	-0.0549816
cg25345365	-0.0822168
cg03546163	-0.00523784
cg05778566	0.0599432
cg07077978	0.00671531
cg07894717	-0.0504105
cg08547072	0.0396407
cg10092231	0.00692763
cg03253556	0.0661731
cg02150231	-0.0509487
cg27580783	0.00362191
cg05201958	0.066668
cg03693471	0.0647355
cg01049995	-0.0195446
cg01584000	0.0201543
cg12203080	-0.0171342
cg06258834	-0.00583669
cg03250870	-0.0171303
cg04333785	-0.0197557
cg19873536	-0.00682332
cg26460483	-0.0275761
cg03143236	0.0281311
cg02827061	-0.0188882
cg12710247	0.00900956
cg17087916	0.00852219
cg15264991	0.00645757
cg19717060	0.0433278
cg23211736	-0.0129158
cg15019353	0.0398116
cg26672932	0.000595663
cg11294626	0.0156758
cg19752047	-0.0357295
cg01698036	-0.00403753
cg25338319	0.00800454
cg18756498	0.00208273
cg13745082	0.017044
cg20381985	0.0124019
cg16312552	0.0648899
cg17252077	0.0064972
cg26274662	0.00303842
cg18093064	0.00578719
cg05330314	-0.0392141
cg01620082	0.00147046
cg15434056	-0.0206853
cg06744472	0.019826
cg17960164	0.00532342
cg10816016	-0.0949098
cg11064537	7.59956e-06
cg02810291	0.0673839
cg07319098	-0.0020312
cg20221591	-0.023906
cg08640904	-0.00536337
cg27589058	0.0470076
cg17995197	-0.0210129
cg00039662	0.14549
cg06976770	0.0515393
cg19015046	0.0669969
cg05758804	-0.0279274
cg00626119	0.0384504
cg14126884	-0.054697
cg09195771	-0.0415402
cg09068447	-0.0063811
cg01930446	-0.0323675
cg12624750	0.118441
cg02686174	0.0180466
cg12998079	-0.116045
cg11245384	0.0322894
cg02500231	0.0140909
cg17774776	-0.00786033
cg06002476	-0.0939564
cg04139465	-0.0365243
cg09248429	0.0356705
cg06864431	-0.0943107
cg16626063	-0.0101109
cg00090697	0.00371078
cg16212587	-0.104553
cg11915366	0.0700816
cg12507207	-0.0298439
cg11529819	-0.0814575
cg01929764	-0.0149565
cg08246632	0.0329715
