# Supplementary material for: NEOage clocks - epigenetic clocks to estimate post-menstrual and postnatal age in preterm infants
Source: Aging (Albany NY). 2021 Oct 16;13(20):23527–44. doi: 10.18632/aging.203637 (PMC8580352; doi:10.18632/aging.203637)
Supplement: Supplementary Table 4 [file aging-13-203637-s004.xlsx]

## Sheet: Supplementary Table 4 PNA-EPIC
Supplementary Table 4. CpGs and corresponding coefficients of the EPIC-PNA NEOage clock.
ID	coef
(Intercept)	9.03039
cg05394010	-0.180945
cg26173375	0.0311116
cg17250863	0.134439
cg12510512	-0.000563964
cg01287088	0.0169541
cg09580592	0.0170184
cg17040309	-0.00633377
cg22002061	0.0107675
cg17953764	0.0327655
cg17178919	-0.00264695
cg04777726	0.0299197
cg17119907	0.0327835
cg10313947	0.201596
cg04808027	-0.00394922
cg15414975	0.014894
cg26459700	-0.00342051
cg15872575	0.00591701
cg16989117	0.0272632
cg15760474	0.00136575
cg23598212	-0.053031
cg02162534	-0.0119162
cg14328115	0.124453
cg02185675	0.0335213
cg16885600	0.0177594
cg09920172	-0.00119231
cg25878452	0.153696
cg13291836	-0.00321758
cg24398268	0.107085
cg05043431	-0.0113934
cg21435684	-0.00234248
cg14136893	0.0112332
cg24541835	-0.0960248
cg13496862	0.0833098
cg23241448	0.00852018
cg10378364	-0.032271
cg21991195	-0.0265814
cg13225830	-0.0926604
cg10900641	-0.105564
cg12063490	-0.0265549
cg06665333	-0.0337693
cg04785299	0.000652342
cg03365751	0.0589773
cg24202817	0.075803
cg19126169	-0.00749254
cg09751239	0.0705218
cg24637308	0.0110448
cg16521032	0.00699527
cg24045078	-0.0726114
cg13407169	-0.0089341
cg16582344	0.169692
cg25770702	0.00916521
cg12530994	-0.0652474
cg13488570	0.0785256
cg05587118	-0.0688211
cg15971010	0.0253071
cg00583535	-0.0880637
cg08662533	-0.0498575
cg23176214	-0.0405974
cg04861640	-0.030105
cg14569639	-0.0512001
cg05265234	-0.0674731
cg17842621	-0.0120401
cg05791870	0.0512645
cg15184495	0.0273936
cg02038852	0.0764092
cg08664849	-0.0588548
cg25046790	-0.0211684
cg27616227	-0.131952
cg04880138	0.0359925
cg00851261	-0.00567738
cg05928290	0.0447922
cg26559974	0.0726683
cg12912663	-0.000366174
cg09854409	-0.00288918
cg22251148	0.000673656
cg01330670	0.0362229
cg18725867	0.0391685
cg23563927	-0.0141776
cg00667789	0.0018597
cg22685935	0.0231112
cg27037305	0.000270753
cg18648269	0.000397429
cg00747959	0.0261864
cg11822659	-0.0527725
cg17716056	-0.000323528
cg24222194	-0.000710146
cg19791409	-0.0176147
cg23798064	0.0196597
cg11453400	-0.017946
cg14862395	0.0437224
cg00897095	-0.0294599
cg16513215	0.00396278
cg27475074	0.0241758
cg24896090	-0.00602325
cg05588271	-0.00872348
cg27539692	0.0123714
cg08062194	0.00350011
cg09887687	-0.22835
cg11418620	0.000453117
cg14777143	0.0274687
cg05002837	0.0191415
cg19445230	0.179735
cg02200107	0.061963
cg16001811	-9.06383e-05
cg01652514	-0.0147809
cg05242561	0.0791373
cg20745513	-0.00428187
cg14879569	0.0115143
cg04069811	-0.0080092
cg07563385	0.0681494
cg00427939	-0.0015219
cg11135412	6.71575e-05
cg21829116	0.0284401
cg21219851	0.0672053
cg02704158	0.0106052
cg00713214	-0.0294714
cg10985479	0.00586436
cg16242410	-0.160498
cg00049440	-0.054889
cg19454119	0.123668
cg20544356	0.0908233
cg07231045	0.0233343
cg00626856	-0.0997077
cg26406689	-0.00654204
cg01454951	-0.121702
cg03089483	-0.0941379
cg05494483	0.0176823
cg11629026	-0.0231748
cg03470646	0.00481111
cg02485044	0.112571
cg11736020	-0.00915192
cg22196878	-0.000962257
cg26164269	0.069151
cg12541478	-0.124866
cg05784157	0.000168381
cg22443975	-0.00805095
cg04572760	0.0388623
cg01964562	0.00346682
cg00278392	-0.0434617
cg13976508	0.000368814
cg12654533	0.0163786
cg09505476	0.0305512
cg09235599	0.0157184
cg26678245	-0.0670876
cg14929173	-0.0467088
cg21296230	0.0519213
cg25870071	0.056147
cg15928398	0.023428
cg25732687	0.0362296
cg00851394	-0.00444891
cg12232783	-0.0440055
cg03161393	0.0234498
cg11992241	0.0869169
cg23246961	-0.0552958
cg17524429	0.012597
cg01099220	-0.0639529
cg06215416	0.0251919
cg01456831	0.0445024
cg04068313	0.0334142
cg02459110	-0.0615942
cg14350954	0.0285199
cg19818308	0.0539208
cg01102477	0.0566365
cg26084259	0.023673
cg13366863	-2.97374e-05
cg03951995	0.0535822
cg23431382	0.0359793
cg27430693	0.0173618
cg11469308	0.0381583
cg00870701	-0.0291914
cg21664351	0.0560404
cg05764738	-0.0188021
cg15411900	-0.0321561
cg16323245	-0.0226398
cg06884254	0.0508434
cg13935652	0.0351294
cg25419384	-0.00438809
cg04279026	-0.0214405
cg13451481	-1.57703e-05
cg09970435	9.75823e-05
cg04379348	0.0141233
cg12266861	0.0235358
cg00599354	0.0103393
cg13716443	-0.0132995
cg24229553	0.00141131
cg25827022	0.0739525
cg15877915	0.0079843
cg14647896	0.0468117
cg25049210	0.117371
cg16159258	0.072632
cg24543970	-0.00666919
cg09734183	-0.0873653
cg24420338	-0.042028
cg11965652	0.0523418
cg02225096	-0.127043
cg08599437	0.00394212
cg23577104	-0.0138549
cg11099684	0.0580494
cg03211481	0.0204993
cg18736736	-0.00858085
cg07278006	-0.016833
cg06492494	-0.0691128
cg17225909	0.00951395
cg15699099	0.0095431
cg05211746	-0.00525361
cg17533663	0.000294398
cg12391388	-0.000300474
cg09163646	-0.123995
cg24530795	0.000340117
cg19303238	-0.0419123
cg03097275	0.0266001
cg01633438	0.00396901
cg07842680	-0.010864
cg16298603	-0.115497
cg05397524	0.0378065
cg00747591	0.0259987
cg11025705	-0.00271274
cg10525394	-0.0270776
cg20129842	-0.0060172
cg03316587	0.0325183
cg00013374	-0.02196
cg00103200	-0.000452085
cg08211187	-0.0246065
cg08203715	0.0065211
cg10560060	0.0515713
cg14611844	0.0146114
cg22768358	0.00529151
cg05077668	0.0751374
cg16804165	0.055629
cg26703752	0.0253447
cg11701679	0.00156525
cg26169700	-0.0194091
cg07010088	0.0524036
cg03009447	0.0494884
cg18246442	0.048943
cg11838152	-0.0192891
cg09372472	0.0329531
cg23260877	-0.0619636
cg02218268	-0.0370897
cg22009500	-0.00200449
cg15905435	-0.004418
cg12326725	0.000142621
cg10585941	0.0567225
cg01997105	0.0784106
cg24032265	-0.0889628
cg18036068	-0.00157268
cg08924131	-0.00635915
cg08090640	-0.0171485
ch.2.75111475F	0.0232101
cg17788374	0.140089
cg15444722	0.0221874
cg12143028	-0.0239712
cg13560058	-0.00962931
cg04436818	-0.00741205
cg07318287	-0.149255
cg04862002	0.0145269
cg18769825	0.160866
cg24162051	-0.00104356
cg25392325	-0.0157343
cg27664674	-0.00167486
cg22007809	0.127314
cg00465247	0.0987889
cg23678254	-0.064129
cg17748470	-0.00167453
cg13523386	0.0189349
cg00966522	-0.0140701
cg16128973	0.069356
cg11891239	-0.0170409
cg08840620	-0.000710692
cg03976842	0.0591051
cg23296904	-0.0733256
cg22511388	-0.03064
cg24536244	-0.0423092
cg01548600	-0.0702332
cg07154304	-0.000468461
cg24293567	0.00032213
cg06754358	0.0201719
cg21861324	-0.011472
cg20236128	0.000811292
cg07881152	0.179172
cg04645211	0.0855748
cg11762303	-0.0149591
cg02284625	-0.00417227
cg10193222	9.07033e-05
cg03691549	0.0156935
cg08277548	0.0136472
cg00902823	-0.000149136
cg19238575	0.0134878
cg15842366	-0.0565021
cg16474118	-0.0596121
cg27362010	-0.0111692
cg08639424	0.0198045
cg15593604	0.134682
cg00169725	2.91703e-05
cg19746940	-0.123569
cg01121910	0.00222917
cg19642270	-0.0280471
cg08935541	-0.110331
cg02401149	0.0360023
cg01138164	0.0635684
cg08867549	0.038532
cg06797644	0.0320466
cg19933595	-0.0375358
cg25422051	-0.000339501
cg00016841	-0.00793741
cg26532527	0.121252
cg26599989	0.0218811
cg15727463	-0.0442348
cg22948684	-0.104901
cg05968312	-0.0821122
cg07559526	0.033642
cg07102919	-0.0340786
cg06869609	0.0597596
cg18500830	-0.0722753
cg17721270	0.0245968
cg10256330	0.0142963
cg20870820	0.00746807
cg24796046	-0.076501
cg00150523	-0.0144715
cg02155558	0.000914746
cg10931627	0.00409154
cg04561571	-0.0494194
cg26517376	-0.00542807
cg08356618	-0.0824009
cg13315047	-0.0153775
cg13202877	0.013782
cg13942103	-0.124715
cg10302026	0.0124847
cg21135560	0.00963559
cg00975912	0.00270059
cg27341789	-0.0334925
cg22979812	0.0913272
cg15823642	0.0331075
cg07599451	0.0251835
cg05385282	-0.0113122
cg17583204	0.0122363
cg04971650	0.0554321
cg09786865	0.000364328
cg06244990	-0.100491
cg19764731	-0.0564059
cg02063076	-0.0306619
cg03502284	-0.0283114
cg01745448	-0.0160496
cg25845304	-0.0365494
cg21978815	-0.00825859
cg16825935	-0.0966738
cg25550088	0.0176187
cg11424970	-0.00539259
cg13792444	0.0461793
cg17419815	0.0008628
cg09495769	-0.0117342
cg04282607	0.11494
cg22483743	0.0130665
cg24219985	0.050077
cg01561154	0.0298323
cg25028773	0.0213534
cg07732472	0.0431583
cg05653018	0.00293792
cg16024258	-0.0273694
cg06952310	0.0106044
cg01916724	-0.075609
cg06916059	0.0293662
cg25423386	-0.0467207
cg17746033	0.0148997
cg08756033	0.0231447
cg18959748	-0.0705647
cg02887723	0.0427442
cg22854981	0.0639824
cg23700722	-0.0111473
cg14870420	0.00715644
cg15987431	-0.00352676
cg13111471	0.0391693
cg05624226	-0.368392
cg22842797	0.0264357
cg24675442	-0.14136
cg04132407	-0.0364707
cg08564831	-0.016296
cg02360587	0.0249137
cg05292376	-0.000978617
cg21982420	0.0196272
cg26199493	0.00422803
cg26179497	0.0134915
cg02607450	-0.025905
cg16976594	-0.0150022
cg24361808	-0.00773241
cg09023900	-0.0118619
cg05910867	0.007016
cg27481747	0.000599551
cg12428558	0.0390675
cg22661942	-0.04999
cg06185452	0.0248145
cg16076065	-0.0450051
cg06423822	0.0334304
cg20733386	0.0032514
cg02961654	0.0353662
cg13204699	0.00656293
cg03922639	0.0192523
cg25988603	0.0471885
cg19224164	-0.0197808
cg14448735	-0.0147471
cg13624964	0.0949584
cg04318178	-0.0394224
cg12286573	0.0476681
cg27472042	0.0912623
cg10202436	-0.0168843
cg27044264	-0.0300991
cg22539465	-0.0327383
cg00452400	0.00577482
cg02717595	0.000348223
cg27298253	0.025896
cg27343222	-0.0114812
cg03138928	-0.00700302
cg24474319	0.00250683
cg13132182	0.0376626
cg05669216	0.00103867
cg02855432	-0.0274048
cg01788483	0.000812157
cg25212737	-0.112482
cg26656815	0.00828704
cg18197263	0.019193
cg19443705	0.00163574
cg27496340	-0.00410203
cg01362541	-0.022276
cg03751055	-0.00641572
cg24576672	-0.00666542
cg06708956	0.00196856
cg04290119	0.0621657
cg06586713	0.00495872
cg09418701	0.001615
cg25378279	0.0723715
cg17047158	7.31401e-07
cg11303900	0.0439683
cg20359445	0.029041
cg21723559	-0.0377419
cg05639004	0.000196423
cg14032371	0.00740774
cg23032936	-0.0428004
cg03114057	-0.00109554
cg02559928	0.0394812
cg01019514	-0.0237232
cg14051264	-0.125496
cg12696399	0.00161156
cg03835671	0.167753
cg01435586	-0.0579483
cg13066289	0.0630376
cg07190012	0.0182705
cg02330710	-0.0216414
cg22539432	0.0590519
cg02976351	0.0110267
cg03693471	0.0342463
cg01049995	-0.0918815
cg05303986	0.0338128
cg11294335	0.0268051
cg11876476	-0.0245735
cg17087916	0.0396717
cg11676038	0.0471886
cg12289983	0.00245043
cg00721062	0.000559449
cg26021884	0.000144456
cg12591898	0.00315966
cg04745805	-0.00222249
cg00671011	0.02915
cg27478961	-0.00629276
cg02828104	0.0160489
cg14141514	-0.0623459
cg00580497	-0.0367172
cg20456564	0.0148631
cg00546915	-0.0256973
cg15287850	0.00940488
cg09907658	-0.0292351
cg25716102	0.0336047
cg04379703	0.00039389
cg12566573	0.111021
cg17830308	0.060081
cg17001765	-0.0337174
cg09026360	0.0641314
cg12550344	0.0597586
cg17715521	0.0332471
cg06049452	-0.0422348
cg05759148	0.0202959
cg12031060	-0.0205673
cg04180086	0.0401583
cg11576877	0.0330138
cg06913388	0.0265235
cg17995197	-0.0302613
cg19622474	0.0268273
cg01183537	0.0200554
cg21658932	-0.000175725
cg22388903	0.0370082
cg17852991	0.14973
cg17459233	-0.0132073
cg12344107	0.0212984
cg00221494	-0.0295755
cg02686174	0.071815
cg13890447	0.0018248
cg22645539	0.125056
cg26800289	-0.187223
cg24127477	-0.0869644
cg06405246	-0.0696593
cg02500231	0.00224309
cg06002476	-0.0692313
cg17254756	0.143314
cg17171786	-0.00228357
cg24619607	0.0312953
cg16212587	-0.00623274
cg22707438	0.0337928
cg10926303	0.0192348
cg19771626	0.0133296
cg14280287	0.0769306
